# Supplementary material for: Facile graphene n-doping by wet chemical treatment for electronic applications
Source: Royal Society of Chemistry journal article supplement (doi:10.1039/c4nr01160k), 2014-05-26
Supplement: c4nr01160k1.pdf [file c4nr01160k1.pdf]

## Supplementary Information

# Facile Graphene N-Doping by Wet Chemical Treatment for Electronic Applications

*Jae Hoon Bong,<sup>a, d</sup> Onejae Sul,<sup>a, d</sup> Alexander Yoon,<sup>c</sup> Sung-Yool Choi<sup>a, b</sup> and Byung Jin Cho<sup>a, b, \*</sup>*

<sup>a</sup>Department of Electrical Engineering, KAIST, Daejeon 305-701, Republic of Korea

<sup>b</sup>Graphene Research Center (GRC), KAIST, Daejeon 305-701, Republic of Korea

<sup>c</sup>LAM Research Corporation, San Jose, California 95134, United States

\*Corresponding Author E-mail: [bjcho@kaist.edu](mailto:bjcho@kaist.edu)

<sup>d</sup>J. H. Bong and O. Sul contributed to this work equally.

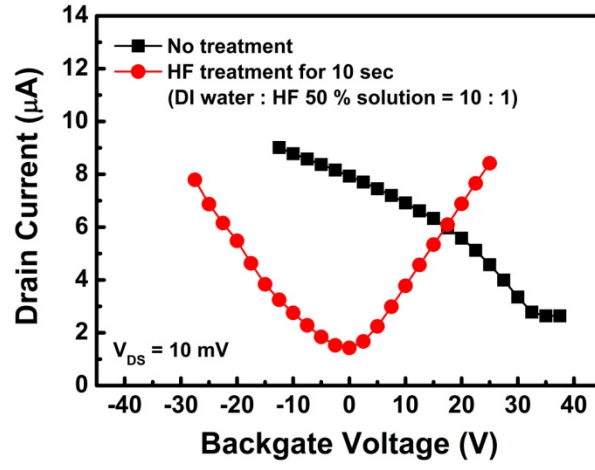

**Figure S1.**  $I_{\text{DS}}-V_{\text{GS}}$  characteristics of a back-gated graphene FET after HF treatment for 10 seconds. The volume ratio of DI water and HF 50 % solution is 10:1.

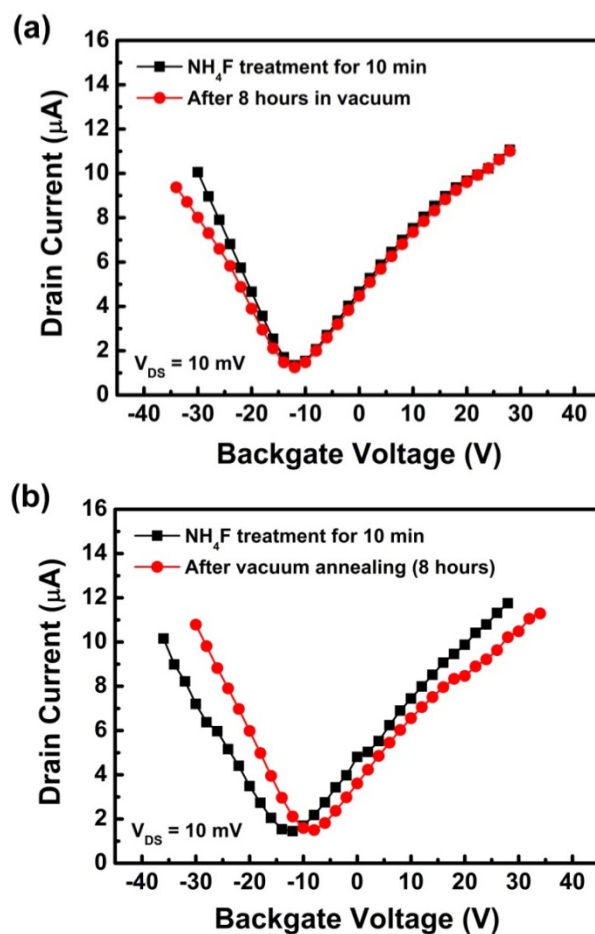

**Figure S2.** (a)  $I_{DS}$ - $V_{GS}$  characteristics of  $NH_4F$  treated graphene devices when the devices are in vacuum ( $\sim 10^{-3}$  Torr) for 8 hours. (b)  $I_{DS}$ - $V_{GS}$  characteristics of  $NH_4F$  treated graphene devices after the devices are annealed in vacuum ( $\sim 10^{-7}$  Torr) at 300 °C for 8 hours.
